# Supplementary material for: Robust barcoding and identification of Mycobacterium tuberculosis lineages for epidemiological and clinical studies
Source: PubMed Central journal article supplement (PMC7734807; doi:10.1186/s13073-020-00817-3), 2020-12-14
Supplement: 13073_2020_817_MOESM1_ESM.pdf [file 13073_2020_817_MOESM1_ESM.pdf]

**Table S1: The study samples (N=35,298) used and their lineages (L)**

| Region         | No. countries | L1          | L2          | L3          | L4           | L5         | L6         | L7        | L8       | L9       | <i>M.bovis, caprae, orygis</i> |
|----------------|---------------|-------------|-------------|-------------|--------------|------------|------------|-----------|----------|----------|--------------------------------|
| North America  | 10            | 317         | 390         | 228         | 1414         | 3          | -          | -         | -        | -        | 8                              |
| South America  | 6             | 4           | 57          | 1           | 851          | -          | -          | -         | -        | -        | 2                              |
| Western Europe | 14            | 749         | 1047        | 1880        | 4551         | 17         | 27         | -         | -        | -        | 178                            |
| Eastern Europe | 15            | 3           | 974         | 5           | 788          | -          | -          | -         | -        | -        | 2                              |
| North Africa   | 5             | -           | -           | -           | 60           | -          | -          | -         | -        | -        | -                              |
| West Africa    | 12            | 5           | 5           | -           | 184          | 212        | 114        | -         | -        | -        | 1                              |
| East Africa    | 9             | 43          | 6           | 36          | 112          | -          | 1          | 64        | 2        | 3*       | 1                              |
| South Africa   | 3             | 80          | 1451        | 145         | 3380         | -          | -          | -         | -        | -        | 1                              |
| Central Africa | 10            | 291         | 93          | 238         | 1965         | 25         | 2          | -         | -        | -        | 11                             |
| Central Asia   | 15            | 40          | 344         | 418         | 191          | -          | -          | -         | -        | -        | 3                              |
| South Asia     | 2             | 309         | 74          | 109         | 55           | -          | -          | -         | -        | -        | -                              |
| East Asia      | 15            | 1202        | 3513        | 50          | 1060         | -          | -          | -         | -        | -        | -                              |
| Oceania        | 1             | 6           | 21          | 5           | 33           | -          | -          | -         | -        | -        | -                              |
| Unknown        | -             | 316         | 903         | 810         | 3559         | 24         | 23         | -         | -        | -        | 203                            |
| <b>Total</b>   | <b>118</b>    | <b>3365</b> | <b>8878</b> | <b>3925</b> | <b>18203</b> | <b>281</b> | <b>167</b> | <b>64</b> | <b>2</b> | <b>3</b> | <b>410</b>                     |
| Training N     | -             | 2162        | 4556        | 2654        | 8320         | 26         | 32         | 38        | 2        | 3        | 110                            |
| Test N         | -             | 1203        | 4322        | 1271        | 9883         | 255        | 135        | 26        | -        | -        | 300                            |

\* predicted in reference [3]

**Table S2: Robust barcoding SNPs (421 SNPs, including the 90 minimal barcoding SNPs in Table S3)**

| Lineage | Position | Change | Strand | Amino acid | Gene           | Locus   | Functional Category          |
|---------|----------|--------|--------|------------|----------------|---------|------------------------------|
| 1       | 272678   | C->T   | -      | 54A        | <i>Rv0227c</i> | Rv0227c | cell wall and cell processes |
| 1       | 344288   | C->G   | +      | 89S        | <i>eccB3</i>   | Rv0283  | cell wall and cell processes |
| 1       | 615938   | G->A   | +      | 368E       | <i>hemL</i>    | Rv0524  | IMR                          |
| 1       | 646531   | A->T   | +      | 78T        | <i>menD</i>    | Rv0555  | IMR                          |
| 1       | 811492   | C->G   | +      | 40V        | <i>rplN</i>    | Rv0714  | information pathways         |
| 1       | 812502   | C->T   | +      | 148V       | <i>rplE</i>    | Rv0716  | information pathways         |
| 1       | 865761   | C->T   | +      | 392H       | <i>purD</i>    | Rv0772  | IMR                          |
| 1       | 1560912  | G->A   | +      | 156E       | <i>pyrF</i>    | Rv1385  | IMR                          |
| 1       | 1590555  | C->T   | +      | 53T        | <i>ribA2</i>   | Rv1415  | IMR                          |
| 1       | 2897528  | G->A   | -      | 92A        | <i>aspS</i>    | Rv2572c | information pathways         |
| 1       | 3233605  | G->A   | -      | 179L       | <i>ftsY</i>    | Rv2921c | cell wall and cell processes |
| 1       | 3647591  | A->G   | -      | 73N        | <i>rmlD</i>    | Rv3266c | IMR                          |
| 1       | 3830566  | G->A   | -      | 318S       | <i>guaB2</i>   | Rv3411c | IMR                          |
| 1       | 4022652  | G->A   | -      | 384S       | <i>cysS1</i>   | Rv3580c | information pathways         |
| 1       | 4081987  | G->C   | -      | 245A       | <i>Rv3644c</i> | Rv3644c | information pathways         |
| 1       | 4081996  | G->C   | -      | 242P       | <i>Rv3644c</i> | Rv3644c | information pathways         |
| 1       | 4155266  | C->G   | +      | 509G       | <i>leuA</i>    | Rv3710  | IMR                          |
| 1.1     | 2989683  | C->T   | +      | 131A       | <i>aftC</i>    | Rv2673  | cell wall and cell processes |
| 1.1     | 4404247  | G->A   | +      | 352L       | <i>Rv3915</i>  | Rv3915  | IMR                          |
| 1.1.1   | 529363   | C->T   | +      | 252V       | <i>groEL2</i>  | Rv0440  | VDA                          |
| 1.1.1   | 870112   | C->T   | +      | 35A        | <i>purB</i>    | Rv0777  | IMR                          |
| 1.1.1   | 1261056  | C->T   | -      | 97G        | <i>metE</i>    | Rv1133c | IMR                          |
| 1.1.1   | 1924765  | T->C   | +      | 313L       | <i>pyrG</i>    | Rv1699  | IMR                          |
| 1.1.1   | 2078024  | G->A   | +      | 716P       | <i>gcvB</i>    | Rv1832  | IMR                          |
| 1.1.1.1 | 1750465  | T->C   | +      | 924L       | <i>dnaE1</i>   | Rv1547  | information pathways         |
| 1.1.1.1 | 2412584  | G->A   | -      | 256A       | <i>murG</i>    | Rv2153c | cell wall and cell processes |
| 1.1.1.1 | 2994964  | C->T   | -      | 33G        | <i>hemE</i>    | Rv2678c | IMR                          |
| 1.1.2   | 2622402  | G->A   | -      | 17A        | <i>dnaG</i>    | Rv2343c | information pathways         |
| 1.1.2   | 3879882  | G->A   | -      | 63N        | <i>rpsM</i>    | Rv3460c | information pathways         |
| 1.1.2   | 4157259  | G->A   | +      | 93V        | <i>Rv3712</i>  | Rv3712  | IMR                          |
| 1.1.3   | 15177    | C->G   | +      | 88A        | <i>trpG</i>    | Rv0013  | IMR                          |
| 1.1.3   | 1491275  | G->A   | -      | 346H       | <i>glgB</i>    | Rv1326c | IMR                          |
| 1.1.3.1 | 403481   | C->T   | -      | 787R       | <i>Rv0338c</i> | Rv0338c | IMR                          |
| 1.1.3.1 | 1345104  | G->A   | -      | 22L        | <i>dapD</i>    | Rv1201c | IMR                          |
| 1.1.3.2 | 285096   | G->T   | -      | 586R       | <i>aftD</i>    | Rv0236c | cell wall and cell processes |
| 1.1.3.2 | 2369187  | C->T   | -      | 181L       | <i>prcA</i>    | Rv2109c | IMR                          |
| 1.1.3.2 | 2369460  | G->A   | -      | 90D        | <i>prcA</i>    | Rv2109c | IMR                          |
| 1.1.3.2 | 2418554  | G->A   | -      | 151L       | <i>murF</i>    | Rv2157c | cell wall and cell processes |
| 1.1.3.2 | 4084405  | G->A   | +      | 533R       | <i>Rv3645</i>  | Rv3645  | cell wall and cell processes |

|         |         |      |   |       |                |         |                              |
|---------|---------|------|---|-------|----------------|---------|------------------------------|
| 1.1.3.2 | 4154816 | G->A | + | 359P  | <i>leuA</i>    | Rv3710  | IMR                          |
| 1.1.3.3 | 2738352 | C->T | - | 445A  | <i>obg</i>     | Rv2440c | IMR                          |
| 1.1.3.3 | 3337585 | G->A | - | 111D  | <i>ddlA</i>    | Rv2981c | cell wall and cell processes |
| 1.2     | 1136017 | A->G | - | 155G  | <i>prsA</i>    | Rv1017c | IMR                          |
| 1.2     | 1553855 | C->T | + | 208T  | <i>pyrB</i>    | Rv1380  | IMR                          |
| 1.2.1   | 590595  | G->A | + | 171Q  | <i>proC</i>    | Rv0500  | IMR                          |
| 1.2.1   | 2640960 | C->T | - | 35A   | <i>glyS</i>    | Rv2357c | information pathways         |
| 1.2.1   | 2847191 | G->A | - | 714D  | <i>fas</i>     | Rv2524c | lipid metabolism             |
| 1.2.1   | 3387252 | G->A | - | 260A  | <i>fixB</i>    | Rv3028c | IMR                          |
| 1.2.1   | 4402048 | C->T | + | 107T  | <i>trxB2</i>   | Rv3913  | IMR                          |
| 1.2.2   | 528781  | G->A | + | 58E   | <i>groEL2</i>  | Rv0440  | VDA                          |
| 1.2.2   | 1567985 | A->G | + | 387E  | <i>metK</i>    | Rv1392  | IMR                          |
| 1.2.2   | 2639868 | A->G | - | 399D  | <i>glyS</i>    | Rv2357c | information pathways         |
| 1.2.2   | 2840849 | G->C | - | 2828G | <i>fas</i>     | Rv2524c | lipid metabolism             |
| 1.2.2   | 3629612 | G->A | - | 12T   | <i>sahH</i>    | Rv3248c | IMR                          |
| 1.2.2   | 3862181 | C->T | - | 70Q   | <i>rplM</i>    | Rv3443c | information pathways         |
| 1.2.2   | 4024368 | C->T | - | 224L  | <i>ispD</i>    | Rv3582c | IMR                          |
| 1.2.2   | 4237383 | C->A | + | 73T   | <i>dprE2</i>   | Rv3791  | lipid metabolism             |
| 1.2.2.1 | 2737201 | A->C | - | 349S  | <i>proB</i>    | Rv2439c | IMR                          |
| 1.3     | 2763624 | G->A | - | 51L   | <i>clpP1</i>   | Rv2461c | IMR                          |
| 1.3     | 4238120 | G->A | + | 63Q   | <i>aftA</i>    | Rv3792  | cell wall and cell processes |
| 1.3.1   | 1245275 | C->T | + | 49A   | <i>gnd2</i>    | Rv1122  | IMR                          |
| 1.3.1   | 1651063 | C->G | + | 116R  | <i>Rv1463</i>  | Rv1463  | cell wall and cell processes |
| 1.3.1   | 3323665 | C->A | - | 13P   | <i>Rv2968c</i> | Rv2968c | cell wall and cell processes |
| 1.3.1   | 3787156 | G->A | + | 281Q  | <i>otsB2</i>   | Rv3372  | VDA                          |
| 1.3.2   | 61842   | T->C | + | 483L  | <i>dnaB</i>    | Rv0058  | information pathways         |
| 1.3.2   | 1492049 | C->T | - | 88L   | <i>glgB</i>    | Rv1326c | IMR                          |
| 1.3.2   | 3147316 | G->A | - | 186G  | <i>infB</i>    | Rv2839c | information pathways         |
| 1.3.2   | 4200993 | T->G | + | 191A  | <i>tyrA</i>    | Rv3754  | IMR                          |
| 2       | 282892  | C->T | - | 1320T | <i>aftD</i>    | Rv0236c | cell wall and cell processes |
| 2       | 811753  | C->T | + | 4H    | <i>rplX</i>    | Rv0715  | information pathways         |
| 2       | 4254431 | G->A | - | 506D  | <i>accD4</i>   | Rv3799c | lipid metabolism             |
| 2       | 4308395 | G->A | - | 174L  | <i>serS</i>    | Rv3834c | information pathways         |
| 2.1     | 648465  | A->G | + | 169A  | <i>Rv0556</i>  | Rv0556  | cell wall and cell processes |
| 2.1     | 1135798 | C->T | - | 228L  | <i>prsA</i>    | Rv1017c | IMR                          |
| 2.1     | 2737453 | A->C | - | 265R  | <i>proB</i>    | Rv2439c | IMR                          |
| 2.1     | 4165481 | G->C | - | 417P  | <i>dnaZX</i>   | Rv3721c | information pathways         |
| 2.2     | 195682  | C->G | + | 230V  | <i>fadD5</i>   | Rv0166  | lipid metabolism             |
| 2.2     | 363464  | G->A | + | 71R   | <i>Rv0298</i>  | Rv0298  | conserved hypotheticals      |
| 2.2     | 465300  | C->T | + | 630F  | <i>Rv0386</i>  | Rv0386  | regulatory proteins          |
| 2.2     | 892416  | C->T | - | 286V  | <i>Rv0799c</i> | Rv0799c | conserved hypotheticals      |

|         |         |      |   |      |                |         |                              |
|---------|---------|------|---|------|----------------|---------|------------------------------|
| 2.2     | 1288698 | G->A | + | 457G | <i>narG</i>    | Rv1161  | IMR                          |
| 2.2     | 1695037 | G->A | - | 36F  | <i>Rv1504c</i> | Rv1504c | conserved hypotheticals      |
| 2.2     | 1849051 | C->T | - | 995P | <i>lysX</i>    | Rv1640c | information pathways         |
| 2.2     | 2112832 | A->C | - | 45A  | <i>Rv1865c</i> | Rv1865c | IMR                          |
| 2.2     | 2202500 | C->T | + | 121H | <i>higA</i>    | Rv1956  | VDA                          |
| 2.2     | 2505085 | G->A | - | 205A | <i>cobC</i>    | Rv2231c | IMR                          |
| 2.2     | 2775361 | C->T | + | 30R  | <i>Rv2472</i>  | Rv2472  | conserved hypotheticals      |
| 2.2     | 2903439 | G->A | - | 31S  | <i>Rv2578c</i> | Rv2578c | conserved hypotheticals      |
| 2.2     | 3477942 | A->G | + | 98T  | <i>moaA1</i>   | Rv3109  | IMR                          |
| 2.2     | 3587446 | G->A | - | 32L  | <i>Rv3210c</i> | Rv3210c | conserved hypotheticals      |
| 2.2     | 4050811 | G->A | - | 691Y | <i>ftsH</i>    | Rv3610c | cell wall and cell processes |
| 2.2     | 4186678 | G->A | + | 15L  | <i>Rv3736</i>  | Rv3736  | regulatory proteins          |
| 2.2     | 4189210 | G->T | + | 504P | <i>Rv3737</i>  | Rv3737  | cell wall and cell processes |
| 2.2.1   | 2078246 | C->G | + | 790G | <i>gcvB</i>    | Rv1832  | IMR                          |
| 2.2.1   | 4158493 | C->T | + | 89I  | <i>cobQ2</i>   | Rv3713  | IMR                          |
| 2.2.1.1 | 1947282 | A->G | - | 46R  | <i>vapC12</i>  | Rv1720c | VDA                          |
| 2.2.1.1 | 4080525 | C->T | - | 12R  | <i>fic</i>     | Rv3641c | cell wall and cell processes |
| 2.2.1.2 | 1692069 | A->G | + | 60A  | <i>Rv1501</i>  | Rv1501  | conserved hypotheticals      |
| 2.2.2   | 346693  | G->T | + | 353S | <i>eccC3</i>   | Rv0284  | cell wall and cell processes |
| 2.2.2   | 1565566 | C->T | + | 42P  | <i>dfp</i>     | Rv1391  | IMR                          |
| 2.2.2   | 2640807 | G->A | - | 86V  | <i>glyS</i>    | Rv2357c | information pathways         |
| 2.2.2   | 3147511 | T->G | - | 121A | <i>infB</i>    | Rv2839c | information pathways         |
| 3       | 342873  | C->T | + | 248V | <i>eccA3</i>   | Rv0282  | cell wall and cell processes |
| 3       | 652950  | T->C | + | 60R  | <i>grcC1</i>   | Rv0562  | IMR                          |
| 3       | 1450316 | C->T | + | 314A | <i>thrA</i>    | Rv1294  | IMR                          |
| 3       | 1764225 | C->T | + | 266A | <i>ilvA</i>    | Rv1559  | IMR                          |
| 3       | 1925136 | G->A | + | 436V | <i>pyrG</i>    | Rv1699  | IMR                          |
| 3       | 2738221 | G->A | - | 9I   | <i>proB</i>    | Rv2439c | IMR                          |
| 3       | 2782498 | G->A | - | 515D | <i>Rv2477c</i> | Rv2477c | cell wall and cell processes |
| 3       | 4396495 | C->A | + | 768G | <i>Rv3909</i>  | Rv3909  | conserved hypotheticals      |
| 3.1     | 958362  | C->G | + | 690A | <i>fadB</i>    | Rv0860  | lipid metabolism             |
| 3.1.1   | 1591545 | G->T | + | 383P | <i>ribA2</i>   | Rv1415  | IMR                          |
| 3.1.1   | 3023684 | G->A | + | 40T  | <i>ideR</i>    | Rv2711  | regulatory proteins          |
| 3.1.2   | 1914217 | C->A | + | 206R | <i>tyrS</i>    | Rv1689  | information pathways         |
| 3.1.2   | 3722702 | G->C | - | 310L | <i>trpS</i>    | Rv3336c | information pathways         |
| 3.1.2.1 | 1237818 | C->G | - | 125L | <i>Rv1111c</i> | Rv1111c | conserved hypotheticals      |
| 3.1.2.1 | 2020120 | C->T | + | 288T | <i>eccC5</i>   | Rv1783  | cell wall and cell processes |
| 3.1.2.1 | 2185538 | G->A | - | 217V | <i>fadE17</i>  | Rv1934c | lipid metabolism             |
| 3.1.2.1 | 2245499 | C->T | + | 97S  | <i>Rv2000</i>  | Rv2000  | conserved hypotheticals      |
| 3.1.2.1 | 2271143 | G->A | - | 202V | <i>Rv2025c</i> | Rv2025c | cell wall and cell processes |
| 3.1.2.1 | 3557911 | C->T | - | 145L | <i>Rv3191c</i> | Rv3191c | insertion seqs and phages    |

|           |         |      |   |       |                |         |                              |
|-----------|---------|------|---|-------|----------------|---------|------------------------------|
| 3.1.2.1   | 4053713 | C->G | - | 45R   | <i>Rv3612c</i> | Rv3612c | conserved hypotheticals      |
| 3.1.2.2   | 343092  | C->T | + | 321F  | <i>eccA3</i>   | Rv0282  | cell wall and cell processes |
| 3.1.2.2   | 346898  | C->T | + | 422L  | <i>eccC3</i>   | Rv0284  | cell wall and cell processes |
| 3.1.2.2   | 1862121 | C->T | + | 788H  | <i>pheT</i>    | Rv1650  | information pathways         |
| 3.1.2.2   | 2415042 | G->T | - | 451P  | <i>murD</i>    | Rv2155c | cell wall and cell processes |
| 3.1.2.2   | 2874344 | G->A | - | 714R  | <i>alaS</i>    | Rv2555c | information pathways         |
| 3.1.2.2   | 3629291 | A->G | - | 119G  | <i>sahH</i>    | Rv3248c | IMR                          |
| 3.2       | 17842   | G->C | - | 307A  | <i>pknA</i>    | Rv0015c | regulatory proteins          |
| 3.2       | 1919627 | G->A | + | 294V  | <i>ppnK</i>    | Rv1695  | IMR                          |
| 4         | 2825466 | A->G | + | 263K  | <i>Rv2509</i>  | Rv2509  | IMR                          |
| 4         | 2994187 | C->T | - | 292L  | <i>hemE</i>    | Rv2678c | IMR                          |
| 4         | 3830695 | G->A | - | 275A  | <i>guaB2</i>   | Rv3411c | IMR                          |
| 4.1       | 62657   | G->A | + | 754P  | <i>dnaB</i>    | Rv0058  | information pathways         |
| 4.1       | 284623  | G->A | - | 743T  | <i>aftD</i>    | Rv0236c | cell wall and cell processes |
| 4.1       | 902413  | C->T | + | 101V  | <i>purF</i>    | Rv0808  | IMR                          |
| 4.1.1     | 265968  | C->G | + | 154R  | <i>echA1</i>   | Rv0222  | lipid metabolism             |
| 4.1.1     | 514245  | C->T | - | 359V  | <i>ctpH</i>    | Rv0425c | cell wall and cell processes |
| 4.1.1     | 869440  | C->T | - | 108L  | <i>Rv0776c</i> | Rv0776c | conserved hypotheticals      |
| 4.1.1     | 1256806 | C->T | + | 225D  | <i>prpC</i>    | Rv1131  | IMR                          |
| 4.1.1     | 1952601 | C->T | + | 250H  | <i>Rv1726</i>  | Rv1726  | IMR                          |
| 4.1.1     | 2158582 | G->A | - | 170G  | <i>fadB5</i>   | Rv1912c | lipid metabolism             |
| 4.1.1     | 2603797 | G->A | - | 142I  | <i>lppP</i>    | Rv2330c | cell wall and cell processes |
| 4.1.1     | 2752854 | G->A | - | 47D   | <i>Rv2452c</i> | Rv2452c | conserved hypotheticals      |
| 4.1.1     | 3129359 | C->T | - | 805K  | <i>Rv2823c</i> | Rv2823c | conserved hypotheticals      |
| 4.1.1     | 3231091 | C->A | - | 472V  | <i>amt</i>     | Rv2920c | cell wall and cell processes |
| 4.1.1     | 3597737 | C->T | - | 10V   | <i>TB7.3</i>   | Rv3221c | lipid metabolism             |
| 4.1.1     | 4003130 | G->A | + | 498V  | <i>fadD3</i>   | Rv3561  | lipid metabolism             |
| 4.1.1     | 4306767 | G->A | - | 15G   | <i>Rv3832c</i> | Rv3832c | conserved hypotheticals      |
| 4.1.1.1   | 1006080 | G->A | - | 161V  | <i>prpA</i>    | Rv0903c | regulatory proteins          |
| 4.1.1.1   | 2824839 | C->T | + | 54A   | <i>Rv2509</i>  | Rv2509  | IMR                          |
| 4.1.1.2   | 1109535 | G->A | + | 88K   | <i>galU</i>    | Rv0993  | IMR                          |
| 4.1.1.2   | 3213615 | G->A | - | 80Y   | <i>lepB</i>    | Rv2903c | cell wall and cell processes |
| 4.1.1.3   | 896356  | C->T | + | 179T  | <i>purL</i>    | Rv0803  | IMR                          |
| 4.1.1.3   | 4154051 | G->A | + | 104R  | <i>leuA</i>    | Rv3710  | IMR                          |
| 4.1.1.3   | 4229087 | C->T | + | 247N  | <i>glfT1</i>   | Rv3782  | cell wall and cell processes |
| 4.1.1.3.1 | 286300  | C->A | - | 184A  | <i>aftD</i>    | Rv0236c | cell wall and cell processes |
| 4.1.1.3.1 | 2739087 | C->T | - | 200V  | <i>obg</i>     | Rv2440c | IMR                          |
| 4.1.1.3.1 | 4269540 | G->A | - | 98P   | <i>ubiA</i>    | Rv3806c | cell wall and cell processes |
| 4.1.2     | 3147742 | A->G | - | 44V   | <i>infB</i>    | Rv2839c | information pathways         |
| 4.1.2.1   | 342340  | C->T | + | 71L   | <i>eccA3</i>   | Rv0282  | cell wall and cell processes |
| 4.1.2.1   | 4256758 | G->C | - | 1463P | <i>pks13</i>   | Rv3800c | lipid metabolism             |

|           |         |      |   |       |                |         |                              |
|-----------|---------|------|---|-------|----------------|---------|------------------------------|
| 4.1.2.1   | 4331585 | G->A | - | 1499D | <i>gltB</i>    | Rv3859c | IMR                          |
| 4.1.2.1.1 | 2488724 | C->G | + | 370P  | <i>glnA1</i>   | Rv2220  | IMR                          |
| 4.1.2.1.1 | 2640369 | G->A | - | 232Y  | <i>glyS</i>    | Rv2357c | information pathways         |
| 4.1.2.1.1 | 4404313 | G->A | + | 374L  | <i>Rv3915</i>  | Rv3915  | IMR                          |
| 4.1.3     | 1564799 | C->T | + | 133P  | <i>gmk</i>     | Rv1389  | IMR                          |
| 4.1.3     | 2450245 | G->A | - | 302A  | <i>pimB</i>    | Rv2188c | lipid metabolism             |
| 4.1.3     | 4228101 | C->T | + | 191D  | <i>rfbE</i>    | Rv3781  | cell wall and cell processes |
| 4.1.4     | 58786   | G->C | + | 67V   | <i>ssb</i>     | Rv0054  | information pathways         |
| 4.1.4     | 590250  | G->T | + | 56T   | <i>proC</i>    | Rv0500  | IMR                          |
| 4.1.4     | 2844014 | G->A | - | 1773F | <i>fas</i>     | Rv2524c | lipid metabolism             |
| 4.1.4     | 4391663 | G->A | - | 471L  | <i>pcnA</i>    | Rv3907c | information pathways         |
| 4.2       | 1466779 | C->T | + | 313I  | <i>atpD</i>    | Rv1310  | IMR                          |
| 4.2       | 1568018 | C->T | + | 398D  | <i>metK</i>    | Rv1392  | IMR                          |
| 4.2       | 1670814 | C->T | + | 134G  | <i>Rv1480</i>  | Rv1480  | conserved hypotheticals      |
| 4.2       | 1872211 | G->A | + | 283A  | <i>argG</i>    | Rv1658  | IMR                          |
| 4.2       | 2748087 | G->A | - | 713S  | <i>valS</i>    | Rv2448c | information pathways         |
| 4.2       | 3198496 | G->A | - | 204I  | <i>tsf</i>     | Rv2889c | information pathways         |
| 4.2       | 3469694 | G->T | - | 30A   | <i>smpB</i>    | Rv3100c | VDA                          |
| 4.2       | 3666905 | C->T | + | 183T  | <i>accA3</i>   | Rv3285  | lipid metabolism             |
| 4.2.1     | 783601  | A->C | + | 373R  | <i>fusA1</i>   | Rv0684  | information pathways         |
| 4.2.1     | 3646964 | C->G | - | 282L  | <i>rmlD</i>    | Rv3266c | IMR                          |
| 4.2.1.1   | 870187  | C->T | + | 60D   | <i>purB</i>    | Rv0777  | IMR                          |
| 4.2.1.1   | 1652216 | A->G | + | 233K  | <i>csd</i>     | Rv1464  | IMR                          |
| 4.2.2     | 353766  | T->C | + | 228I  | <i>eccD3</i>   | Rv0290  | cell wall and cell processes |
| 4.2.2     | 2420503 | A->G | - | 36L   | <i>murE</i>    | Rv2158c | cell wall and cell processes |
| 4.2.2.1   | 1131    | C->A | + | 377I  | <i>dnaA</i>    | Rv0001  | information pathways         |
| 4.2.2.1   | 1455780 | T->C | + | 96L   | <i>prfA</i>    | Rv1299  | information pathways         |
| 4.2.2.2   | 611463  | G->A | - | 204T  | <i>Rv0519c</i> | Rv0519c | cell wall and cell processes |
| 4.2.2.2   | 1233285 | G->A | - | 224Y  | <i>Rv1106c</i> | Rv1106c | IMR                          |
| 4.2.2.2   | 1880850 | G->A | + | 1849L | <i>pks7</i>    | Rv1661  | lipid metabolism             |
| 4.2.2.2   | 2153246 | T->G | - | 213R  | <i>Rv1907c</i> | Rv1907c | conserved hypotheticals      |
| 4.2.2.2   | 2156847 | G->A | - | 151T  | <i>Rv1910c</i> | Rv1910c | cell wall and cell processes |
| 4.2.2.2   | 2923264 | G->A | - | 324L  | <i>ruvB</i>    | Rv2592c | information pathways         |
| 4.2.2.2   | 3141827 | C->G | - | 132L  | <i>ugpA</i>    | Rv2835c | cell wall and cell processes |
| 4.2.2.2   | 3416734 | G->A | + | 10L   | <i>dinP</i>    | Rv3056  | information pathways         |
| 4.2.2.2   | 3497369 | G->A | + | 273L  | <i>Rv3131</i>  | Rv3131  | conserved hypotheticals      |
| 4.2.2.2   | 4298106 | C->A | - | 500S  | <i>pks2</i>    | Rv3825c | lipid metabolism             |
| 4.3       | 1452071 | C->A | + | 25G   | <i>thrB</i>    | Rv1296  | IMR                          |
| 4.3       | 3191027 | G->A | - | 199L  | <i>cdsA</i>    | Rv2881c | lipid metabolism             |
| 4.3.1     | 825585  | T->C | + | 262Y  | <i>secY</i>    | Rv0732  | cell wall and cell processes |
| 4.3.1.1   | 1647807 | T->C | + | 273I  | <i>Rv1461</i>  | Rv1461  | conserved hypotheticals      |

|           |         |      |   |       |                |         |                              |
|-----------|---------|------|---|-------|----------------|---------|------------------------------|
| 4.3.1.1   | 3360032 | G->A | - | 185T  | <i>ilvC</i>    | Rv3001c | IMR                          |
| 4.3.2     | 3414791 | G->C | - | 56A   | <i>nrdH</i>    | Rv3053c | information pathways         |
| 4.3.2.1   | 784581  | G->C | + | 699T  | <i>fusA1</i>   | Rv0684  | information pathways         |
| 4.3.2.1   | 1451542 | C->T | + | 282A  | <i>thrC</i>    | Rv1295  | IMR                          |
| 4.3.2.1   | 1592015 | C->T | + | 115G  | <i>ribH</i>    | Rv1416  | IMR                          |
| 4.3.2.1   | 2844689 | G->C | - | 1548L | <i>fas</i>     | Rv2524c | lipid metabolism             |
| 4.3.3     | 2077253 | G->A | + | 459T  | <i>gcvB</i>    | Rv1832  | IMR                          |
| 4.3.4     | 1297327 | G->A | + | 392V  | <i>lpqW</i>    | Rv1166  | cell wall and cell processes |
| 4.3.4.1   | 1274335 | G->A | + | 327L  | <i>mmpL13b</i> | Rv1146  | cell wall and cell processes |
| 4.3.4.1   | 2199684 | G->A | - | 117F  | <i>Rv1949c</i> | Rv1949c | conserved hypotheticals      |
| 4.3.4.1   | 3244674 | G->A | + | 326R  | <i>fadD26</i>  | Rv2930  | lipid metabolism             |
| 4.3.4.1   | 3285945 | C->G | + | 292A  | <i>mmpL7</i>   | Rv2942  | cell wall and cell processes |
| 4.3.4.2   | 784440  | G->T | + | 652A  | <i>fusA1</i>   | Rv0684  | information pathways         |
| 4.3.4.2.1 | 225495  | T->C | - | 359V  | <i>Rv0193c</i> | Rv0193c | conserved hypotheticals      |
| 4.4       | 4238963 | C->T | + | 344H  | <i>aftA</i>    | Rv3792  | cell wall and cell processes |
| 4.4       | 4307886 | G->A | - | 343R  | <i>serS</i>    | Rv3834c | information pathways         |
| 4.4.1     | 2905505 | G->A | - | 196T  | <i>hisS</i>    | Rv2580c | information pathways         |
| 4.4.1     | 3147376 | G->A | - | 166P  | <i>infB</i>    | Rv2839c | information pathways         |
| 4.4.1     | 3664135 | G->A | + | 149R  | <i>accE5</i>   | Rv3281  | lipid metabolism             |
| 4.4.1     | 3813473 | G->A | - | 202L  | <i>guaA</i>    | Rv3396c | IMR                          |
| 4.4.1.1   | 355181  | G->A | + | 228K  | <i>mycP3</i>   | Rv0291  | IMR                          |
| 4.4.1.1.1 | 15036   | C->G | + | 41A   | <i>trpG</i>    | Rv0013  | IMR                          |
| 4.4.1.1.1 | 1126895 | G->A | - | 37L   | <i>metS</i>    | Rv1007c | information pathways         |
| 4.4.1.1.1 | 1221479 | C->T | + | 302V  | <i>glyA1</i>   | Rv1093  | IMR                          |
| 4.4.1.2   | 342201  | C->G | + | 24P   | <i>eccA3</i>   | Rv0282  | cell wall and cell processes |
| 4.4.1.2   | 345697  | C->T | + | 21T   | <i>eccC3</i>   | Rv0284  | cell wall and cell processes |
| 4.4.1.2   | 1297981 | G->C | + | 610V  | <i>lpqW</i>    | Rv1166  | cell wall and cell processes |
| 4.4.1.2   | 1494231 | G->A | - | 65L   | <i>glgE</i>    | Rv1327c | IMR                          |
| 4.4.1.2   | 1803959 | G->T | + | 222G  | <i>hisA</i>    | Rv1603  | IMR                          |
| 4.4.1.2   | 1808124 | A->C | + | 74P   | <i>trpE</i>    | Rv1609  | IMR                          |
| 4.4.1.2   | 2410938 | A->T | - | 395A  | <i>murC</i>    | Rv2152c | cell wall and cell processes |
| 4.4.1.2   | 3349093 | G->C | - | 395P  | <i>gltS</i>    | Rv2992c | information pathways         |
| 4.4.1.2   | 4392120 | G->A | - | 318H  | <i>pcnA</i>    | Rv3907c | information pathways         |
| 4.4.2     | 985287  | G->A | + | 495P  | <i>fprB</i>    | Rv0886  | IMR                          |
| 4.4.2     | 2913091 | C->T | - | 307V  | <i>secF</i>    | Rv2586c | cell wall and cell processes |
| 4.5       | 620029  | C->T | + | 47L   | <i>ccsA</i>    | Rv0529  | IMR                          |
| 4.6       | 18091   | G->A | - | 224T  | <i>pknA</i>    | Rv0015c | regulatory proteins          |
| 4.6.1     | 435708  | G->A | - | 354T  | <i>purA</i>    | Rv0357c | IMR                          |
| 4.6.1     | 2440953 | G->T | - | 256R  | <i>aroG</i>    | Rv2178c | IMR                          |
| 4.6.1     | 4260268 | G->C | - | 293A  | <i>pks13</i>   | Rv3800c | lipid metabolism             |
| 4.6.1.1   | 4406749 | G->A | - | 261L  | <i>parA</i>    | Rv3918c | cell wall and cell processes |

|         |         |      |   |      |                |         |                              |
|---------|---------|------|---|------|----------------|---------|------------------------------|
| 4.6.1.2 | 1098698 | C->G | + | 397G | <i>mprB</i>    | Rv0982  | regulatory proteins          |
| 4.6.2   | 4260742 | G->A | - | 135P | <i>pks13</i>   | Rv3800c | lipid metabolism             |
| 4.6.2.1 | 896119  | C->T | + | 100F | <i>purL</i>    | Rv0803  | IMR                          |
| 4.6.2.1 | 2897684 | A->G | - | 40D  | <i>aspS</i>    | Rv2572c | information pathways         |
| 4.6.2.2 | 118469  | G->A | + | 252A | <i>Rv0102</i>  | Rv0102  | cell wall and cell processes |
| 4.6.2.2 | 1352350 | C->T | + | 69V  | <i>gpgS</i>    | Rv1208  | IMR                          |
| 4.6.2.2 | 2369118 | G->A | - | 204G | <i>prcA</i>    | Rv2109c | IMR                          |
| 4.6.2.2 | 2875883 | C->T | - | 201L | <i>alaS</i>    | Rv2555c | information pathways         |
| 4.6.2.2 | 3354625 | G->A | - | 149L | <i>serA1</i>   | Rv2996c | IMR                          |
| 4.6.2.2 | 3360152 | C->A | - | 145P | <i>ilvC</i>    | Rv3001c | IMR                          |
| 4.6.3   | 734562  | G->A | + | 103K | <i>nusG</i>    | Rv0639  | information pathways         |
| 4.6.3   | 2516158 | C->G | + | 285T | <i>Rv2242</i>  | Rv2242  | conserved hypotheticals      |
| 4.6.3   | 2516365 | T->C | + | 354Y | <i>Rv2242</i>  | Rv2242  | conserved hypotheticals      |
| 4.6.4   | 4236903 | G->A | + | 375A | <i>dprE1</i>   | Rv3790  | lipid metabolism             |
| 4.6.5   | 17665   | G->A | - | 366N | <i>pknA</i>    | Rv0015c | regulatory proteins          |
| 4.6.5   | 1553876 | C->G | + | 215A | <i>pyrB</i>    | Rv1380  | IMR                          |
| 4.7     | 716918  | G->A | + | 85T  | <i>vapC30</i>  | Rv0624  | VDA                          |
| 4.7     | 3270289 | C->A | + | 851R | <i>ppsE</i>    | Rv2935  | lipid metabolism             |
| 4.7     | 4112595 | G->A | - | 307A | <i>Rv3671c</i> | Rv3671c | IMR                          |
| 4.8     | 1130526 | G->A | + | 112A | <i>ispE</i>    | Rv1011  | IMR                          |
| 4.8.1   | 2914906 | G->C | - | 277T | <i>secD</i>    | Rv2587c | cell wall and cell processes |
| 4.8.1   | 3348870 | G->A | - | 470L | <i>gltS</i>    | Rv2992c | information pathways         |
| 4.8.1   | 3389922 | T->G | + | 274P | <i>Rv3030</i>  | Rv3030  | conserved hypotheticals      |
| 4.8.2   | 2417281 | G->A | - | 65Y  | <i>murX</i>    | Rv2156c | cell wall and cell processes |
| 4.8.2   | 3404883 | G->A | - | 13A  | <i>ctaD</i>    | Rv3043c | IMR                          |
| 4.8.3   | 616408  | C->G | + | 62A  | <i>Rv0525</i>  | Rv0525  | conserved hypotheticals      |
| 4.9     | 420008  | G->A | + | 58A  | <i>dnaK</i>    | Rv0350  | VDA                          |
| 4.9     | 903913  | C->T | + | 63G  | <i>purM</i>    | Rv0809  | IMR                          |
| 4.9     | 3367765 | A->G | - | 343G | <i>gatB</i>    | Rv3009c | information pathways         |
| 4.9.1   | 119600  | C->G | + | 629V | <i>Rv0102</i>  | Rv0102  | cell wall and cell processes |
| 4.9.1   | 1940611 | G->C | + | 108A | <i>engA</i>    | Rv1713  | IMR                          |
| 4.9.1   | 4165205 | C->T | - | 509A | <i>dnaZX</i>   | Rv3721c | information pathways         |
| 5       | 345317  | G->C | + | 432V | <i>eccB3</i>   | Rv0283  | cell wall and cell processes |
| 5       | 352646  | G->A | + | 166P | <i>espG3</i>   | Rv0289  | cell wall and cell processes |
| 5       | 801959  | C->T | + | 166R | <i>rplD</i>    | Rv0702  | information pathways         |
| 5       | 1505806 | C->T | + | 244P | <i>murl</i>    | Rv1338  | cell wall and cell processes |
| 5       | 1555432 | C->T | + | 415T | <i>pyrC</i>    | Rv1381  | IMR                          |
| 5       | 1578212 | A->C | + | 200A | <i>priA</i>    | Rv1402  | information pathways         |
| 5       | 1649265 | G->A | + | 759L | <i>Rv1461</i>  | Rv1461  | conserved hypotheticals      |
| 5       | 1799921 | C->A | + | 113G | <i>hisD</i>    | Rv1599  | IMR                          |
| 5       | 2485956 | G->A | + | 228E | <i>lipA</i>    | Rv2218  | IMR                          |



|   |         |      |   |       |                |         |                              |
|---|---------|------|---|-------|----------------|---------|------------------------------|
| 5 | 2859147 | C->T | - | 48K   | <i>Efp</i>     | Rv2534c | Information pathways         |
| 5 | 3882025 | G->A | + | 63L   | <i>rmlB</i>    | Rv3464  | IMR                          |
| 5 | 4086604 | G->A | - | 218Y  | <i>topA</i>    | Rv3646c | information pathways         |
| 5 | 4387392 | G->A | - | 168F  | <i>Rv3902c</i> | Rv3902c | conserved hypotheticals      |
| 6 | 982363  | G->T | - | 64G   | <i>serC</i>    | Rv0884c | IMR                          |
| 6 | 1069146 | C->T | + | 314G  | <i>purH</i>    | Rv0957  | IMR                          |
| 6 | 1372002 | C->T | - | 316L  | <i>mrp</i>     | Rv1229c | IMR                          |
| 6 | 1811964 | C->A | + | 280R  | <i>trpB</i>    | Rv1612  | IMR                          |
| 6 | 1867707 | C->T | + | 359P  | <i>argJ</i>    | Rv1653  | IMR                          |
| 6 | 2847737 | G->A | - | 532I  | <i>fas</i>     | Rv2524c | lipid metabolism             |
| 6 | 3213255 | C->T | - | 200K  | <i>lepB</i>    | Rv2903c | cell wall and cell processes |
| 6 | 3862148 | G->A | - | 81P   | <i>rplM</i>    | Rv3443c | information pathways         |
| 6 | 4086697 | G->T | - | 187A  | <i>topA</i>    | Rv3646c | information pathways         |
| 6 | 4236891 | C->A | + | 371P  | <i>dprE1</i>   | Rv3790  | lipid metabolism             |
| 7 | 349081  | G->A | + | 1149L | <i>eccC3</i>   | Rv0284  | cell wall and cell processes |
| 7 | 784143  | A->C | + | 553A  | <i>fusA1</i>   | Rv0684  | information pathways         |
| 7 | 811642  | C->T | + | 90D   | <i>rplN</i>    | Rv0714  | information pathways         |
| 7 | 896431  | G->A | + | 204L  | <i>purL</i>    | Rv0803  | IMR                          |
| 7 | 1125894 | A->C | - | 370L  | <i>metS</i>    | Rv1007c | information pathways         |
| 7 | 1137518 | G->A | - | 181N  | <i>glmU</i>    | Rv1018c | cell wall and cell processes |
| 7 | 1297084 | G->A | + | 311L  | <i>lpqW</i>    | Rv1166  | cell wall and cell processes |
| 7 | 1365895 | G->A | + | 7T    | <i>htrA</i>    | Rv1223  | IMR                          |
| 7 | 1463776 | C->T | + | 183V  | <i>atpA</i>    | Rv1308  | IMR                          |
| 7 | 1561245 | C->T | + | 267A  | <i>pyrF</i>    | Rv1385  | IMR                          |
| 7 | 1663221 | T->G | - | 942S  | <i>acn</i>     | Rv1475c | IMR                          |
| 7 | 1799774 | C->T | + | 64A   | <i>hisD</i>    | Rv1599  | IMR                          |
| 7 | 1867937 | C->T | + | 32V   | <i>argB</i>    | Rv1654  | IMR                          |
| 7 | 2086202 | C->G | - | 260V  | <i>glcB</i>    | Rv1837c | IMR                          |
| 7 | 2380244 | G->A | - | 139A  | <i>hisG</i>    | Rv2121c | IMR                          |
| 7 | 2406193 | G->C | - | 217L  | <i>Rv2147c</i> | Rv2147c | conserved hypotheticals      |
| 7 | 2621157 | T->C | - | 432A  | <i>dnaG</i>    | Rv2343c | information pathways         |
| 7 | 2759363 | A->G | - | 42C   | <i>clpX</i>    | Rv2457c | IMR                          |
| 7 | 2842238 | C->A | - | 2365A | <i>fas</i>     | Rv2524c | lipid metabolism             |
| 7 | 2999030 | G->A | - | 313G  | <i>dxs1</i>    | Rv2682c | IMR                          |
| 7 | 3182040 | C->T | - | 324A  | <i>dxr</i>     | Rv2870c | IMR                          |
| 7 | 3225566 | C->T | - | 240A  | <i>ffh</i>     | Rv2916c | cell wall and cell processes |
| 7 | 3324231 | G->C | - | 82S   | <i>Rv2969c</i> | Rv2969c | cell wall and cell processes |
| 7 | 3360233 | G->A | - | 118A  | <i>ilvC</i>    | Rv3001c | IMR                          |
| 7 | 3473482 | C->T | - | 141R  | <i>prfB</i>    | Rv3105c | information pathways         |
| 7 | 3603631 | G->T | + | 85G   | <i>aroA</i>    | Rv3227  | IMR                          |
| 7 | 3635935 | C->G | - | 111R  | <i>manA</i>    | Rv3255c | IMR                          |

|   |         |      |   |      |                |         |                              |
|---|---------|------|---|------|----------------|---------|------------------------------|
| 7 | 3666497 | C->T | + | 47A  | <i>accA3</i>   | Rv3285  | lipid metabolism             |
| 7 | 3667883 | C->A | + | 509V | <i>accA3</i>   | Rv3285  | lipid metabolism             |
| 7 | 3837064 | G->A | - | 75G  | <i>groES</i>   | Rv3418c | VDA                          |
| 7 | 3860696 | G->A | - | 225D | <i>mrsA</i>    | Rv3441c | IMR                          |
| 7 | 3878040 | A->G | - | 156G | <i>rpoA</i>    | Rv3457c | information pathways         |
| 7 | 4022163 | C->T | - | 77L  | <i>Rv3579c</i> | Rv3579c | IMR                          |
| 7 | 4086748 | C->G | - | 170L | <i>topA</i>    | Rv3646c | information pathways         |
| 7 | 4262608 | G->A | - | 153I | <i>fadD32</i>  | Rv3801c | lipid metabolism             |
| 7 | 4267649 | A->G | - | 396G | <i>aftB</i>    | Rv3805c | cell wall and cell processes |
| 7 | 4308411 | T->G | - | 168L | <i>serS</i>    | Rv3834c | information pathways         |
| 7 | 4331184 | G->A | - | 108L | <i>gltD</i>    | Rv3858c | IMR                          |
| 8 | 221190  | G->T | - | 178V | <i>ilvD</i>    | Rv0189c | IMR                          |
| 8 | 270362  | C->A | - | 401V | <i>Rv0226c</i> | Rv0226c | cell wall and cell processes |
| 8 | 343314  | C->T | + | 395A | <i>eccA3</i>   | Rv0282  | cell wall and cell processes |
| 8 | 344414  | G->C | + | 131S | <i>eccB3</i>   | Rv0283  | cell wall and cell processes |
| 8 | 347977  | A->C | + | 781P | <i>eccC3</i>   | Rv0284  | cell wall and cell processes |
| 8 | 442072  | C->A | - | 76A  | <i>fba</i>     | Rv0363c | IMR                          |
| 8 | 742270  | G->T | - | 116S | <i>Rv0647c</i> | Rv0647c | conserved hypotheticals      |
| 8 | 896152  | C->T | + | 111V | <i>purL</i>    | Rv0803  | IMR                          |
| 8 | 903262  | C->A | + | 384V | <i>purF</i>    | Rv0808  | IMR                          |
| 8 | 1227518 | G->A | - | 16T  | <i>fum</i>     | Rv1098c | IMR                          |
| 8 | 1260255 | C->T | - | 364A | <i>metE</i>    | Rv1133c | IMR                          |
| 8 | 1446846 | C->T | + | 156T | <i>argS</i>    | Rv1292  | information pathways         |
| 8 | 1463923 | C->T | + | 232T | <i>atpA</i>    | Rv1308  | IMR                          |
| 8 | 1505182 | C->T | + | 36V  | <i>murl</i>    | Rv1338  | cell wall and cell processes |
| 8 | 1553399 | C->T | + | 56T  | <i>pyrB</i>    | Rv1380  | IMR                          |
| 8 | 1564640 | C->A | + | 80L  | <i>gmk</i>     | Rv1389  | IMR                          |
| 8 | 1629090 | C->G | - | 370P | <i>tkt</i>     | Rv1449c | IMR                          |
| 8 | 1665285 | C->A | - | 254P | <i>acn</i>     | Rv1475c | IMR                          |
| 8 | 1805152 | C->T | + | 100V | <i>hisF</i>    | Rv1605  | IMR                          |
| 8 | 1858921 | C->G | + | 63V  | <i>pheS</i>    | Rv1649  | information pathways         |
| 8 | 1914246 | C->T | + | 215T | <i>tyrS</i>    | Rv1689  | information pathways         |
| 8 | 1922231 | C->T | + | 230V | <i>Rv1697</i>  | Rv1697  | conserved hypotheticals      |
| 8 | 1941256 | C->A | + | 323V | <i>engA</i>    | Rv1713  | IMR                          |
| 8 | 2086736 | G->A | - | 82R  | <i>glcB</i>    | Rv1837c | IMR                          |
| 8 | 2415402 | C->T | - | 331K | <i>murD</i>    | Rv2155c | cell wall and cell processes |
| 8 | 2440802 | A->G | - | 307L | <i>aroG</i>    | Rv2178c | IMR                          |
| 8 | 2450263 | C->T | - | 296V | <i>pimB</i>    | Rv2188c | lipid metabolism             |
| 8 | 2466760 | G->T | + | 588T | <i>asnB</i>    | Rv2201  | IMR                          |
| 8 | 2862497 | G->T | - | 60A  | <i>aroB</i>    | Rv2538c | IMR                          |
| 8 | 2939600 | C->A | - | 121L | <i>Rv2611c</i> | Rv2611c | lipid metabolism             |

|                 |         |      |   |      |               |         |                              |
|-----------------|---------|------|---|------|---------------|---------|------------------------------|
| 8               | 2940079 | C->A | - | 178S | <i>pgsA1</i>  | Rv2612c | lipid metabolism             |
| 8               | 3151706 | C->T | - | 415L | <i>proS</i>   | Rv2845c | information pathways         |
| 8               | 3333720 | C->A | - | 23V  | <i>thiL</i>   | Rv2977c | IMR                          |
| 8               | 3361394 | G->A | - | 531A | <i>ilvB1</i>  | Rv3003c | IMR                          |
| 8               | 3362522 | G->A | - | 155I | <i>ilvB1</i>  | Rv3003c | IMR                          |
| 8               | 3408464 | G->A | - | 305S | <i>nrdF2</i>  | Rv3048c | information pathways         |
| 8               | 3469397 | G->A | - | 129G | <i>smpB</i>   | Rv3100c | VDA                          |
| 8               | 3645324 | G->A | - | 218S | <i>manB</i>   | Rv3264c | cell wall and cell processes |
| 8               | 3786517 | G->A | + | 68S  | <i>otsB2</i>  | Rv3372  | VDA                          |
| 8               | 3830815 | G->A | - | 235D | <i>guaB2</i>  | Rv3411c | IMR                          |
| 8               | 4166096 | G->A | - | 212S | <i>dnaZX</i>  | Rv3721c | information pathways         |
| 8               | 4227348 | C->T | + | 120R | <i>Rv3780</i> | Rv3780  | conserved hypotheticals      |
| 8               | 4406599 | G->A | - | 311S | <i>parA</i>   | Rv3918c | cell wall and cell processes |
| 9               | 2750052 | G->A | - | 58T  | <i>valS</i>   | Rv2448c | information pathways         |
| 9               | 3094577 | G->A | - | 108L | <i>ribF</i>   | Rv2786c | IMR                          |
| 9               | 3370805 | G->C | - | 210S | <i>gatA</i>   | Rv3011c | information pathways         |
| 9               | 3414553 | G->A | - | 44Y  | <i>nrdI</i>   | Rv3052c | information pathways         |
| 9               | 3855303 | G->A | - | 529I | <i>glmS</i>   | Rv3436c | IMR                          |
| <i>M.bovis</i>  | 62768   | A->G | + | 791G | <i>dnaB</i>   | Rv0058  | information pathways         |
| <i>M.bovis</i>  | 3371401 | G->A | - | 12L  | <i>gatA</i>   | Rv3011c | information pathways         |
| <i>M.bovis</i>  | 4229470 | T->C | + | 71Y  | <i>rfbD</i>   | Rv3783  | cell wall and cell processes |
| <i>M.caprae</i> | 904090  | T->C | + | 122G | <i>purM</i>   | Rv0809  | IMR                          |
| <i>M.caprae</i> | 918685  | C->T | - | 22L  | <i>desA1</i>  | Rv0824c | lipid metabolism             |
| <i>M.caprae</i> | 1069305 | G->C | + | 367L | <i>purH</i>   | Rv0957  | IMR                          |
| <i>M.caprae</i> | 2990241 | G->T | + | 317S | <i>aftC</i>   | Rv2673  | cell wall and cell processes |
| <i>M.caprae</i> | 3094181 | G->A | - | 240F | <i>ribF</i>   | Rv2786c | IMR                          |
| <i>M.orygis</i> | 44812   | G->T | + | 417P | <i>leuS</i>   | Rv0041  | information pathways         |
| <i>M.orygis</i> | 59181   | C->T | + | 20C  | <i>rpsR1</i>  | Rv0055  | information pathways         |
| <i>M.orygis</i> | 268953  | C->T | + | 97V  | <i>Rv0225</i> | Rv0225  | cell wall and cell processes |
| <i>M.orygis</i> | 500710  | G->A | - | 103P | <i>thiE</i>   | Rv0414c | IMR                          |
| <i>M.orygis</i> | 748320  | G->A | + | 15A  | <i>rplJ</i>   | Rv0651  | information pathways         |
| <i>M.orygis</i> | 1125468 | C->T | - | 512P | <i>metS</i>   | Rv1007c | information pathways         |
| <i>M.orygis</i> | 1236745 | G->C | + | 187S | <i>lytB2</i>  | Rv1110  | cell wall and cell processes |
| <i>M.orygis</i> | 1344807 | G->A | - | 121P | <i>dapD</i>   | Rv1201c | IMR                          |
| <i>M.orygis</i> | 1449038 | C->T | + | 337G | <i>lysA</i>   | Rv1293  | IMR                          |
| <i>M.orygis</i> | 1555342 | C->T | + | 385A | <i>pyrC</i>   | Rv1381  | IMR                          |
| <i>M.orygis</i> | 1579197 | C->T | + | 529L | <i>priA</i>   | Rv1402  | information pathways         |
| <i>M.orygis</i> | 1652839 | G->C | + | 24G  | <i>Rv1465</i> | Rv1465  | IMR                          |
| <i>M.orygis</i> | 1810542 | G->A | + | 101S | <i>trpC</i>   | Rv1611  | IMR                          |
| <i>M.orygis</i> | 2069383 | T->C | + | 102L | <i>pgsA2</i>  | Rv1822  | lipid metabolism             |
| <i>M.orygis</i> | 2076692 | G->A | + | 272R | <i>gcvB</i>   | Rv1832  | IMR                          |

|                 |         |      |   |      |                |         |                              |
|-----------------|---------|------|---|------|----------------|---------|------------------------------|
| <i>M.orygis</i> | 2078567 | T->C | + | 897Y | <i>gcvB</i>    | Rv1832  | IMR                          |
| <i>M.orygis</i> | 2475305 | G->A | - | 222N | <i>ilvE</i>    | Rv2210c | IMR                          |
| <i>M.orygis</i> | 3039261 | T->C | - | 180A | <i>dapF</i>    | Rv2726c | IMR                          |
| <i>M.orygis</i> | 3061003 | A->G | - | 502L | <i>ftsK</i>    | Rv2748c | cell wall and cell processes |
| <i>M.orygis</i> | 3147196 | G->A | - | 226D | <i>infB</i>    | Rv2839c | information pathways         |
| <i>M.orygis</i> | 3148454 | G->A | - | 325G | <i>nusA</i>    | Rv2841c | information pathways         |
| <i>M.orygis</i> | 3241414 | G->A | - | 182A | <i>Rv2927c</i> | Rv2927c | conserved hypotheticals      |
| <i>M.orygis</i> | 3337480 | A->G | - | 146S | <i>ddlA</i>    | Rv2981c | cell wall and cell processes |
| <i>M.orygis</i> | 3337675 | G->A | - | 81G  | <i>ddlA</i>    | Rv2981c | cell wall and cell processes |
| <i>M.orygis</i> | 3667352 | C->T | + | 332D | <i>accA3</i>   | Rv3285  | lipid metabolism             |
| <i>M.orygis</i> | 3770449 | G->A | - | 67R  | <i>folD</i>    | Rv3356c | IMR                          |
| <i>M.orygis</i> | 4039853 | C->T | - | 284L | <i>clpC1</i>   | Rv3596c | IMR                          |
| <i>M.orygis</i> | 4311950 | T->C | - | 240E | <i>pheA</i>    | Rv3838c | IMR                          |

IMR = Intermediary metabolism and respiration; VDA = virulence, detoxification, adaptation

**Table S3: The ninety minimal barcoding SNPs**

| Lineage   | Position       | Change | Amino Acid | Gene*           | Locus   | Functional Category          |
|-----------|----------------|--------|------------|-----------------|---------|------------------------------|
| 1         | 615938         | G->A   | 368E       | <i>hemL</i>     | Rv0524  | IMR                          |
| 1.1       | 4404247        | G->A   | 352L       | <i>Rv3915</i>   | Rv3915  | IMR                          |
| 1.1.1     | <b>529363</b>  | C->T   | 252V       | <i>groEL2</i>   | Rv0440  | VDA                          |
| 1.1.1.1   | <b>1750465</b> | T->C   | 924L       | <i>dnaE1</i>    | Rv1547  | information pathways         |
| 1.1.2     | 2622402        | G->A   | 17A        | <i>dnaG</i>     | Rv2343c | information pathways         |
| 1.1.3     | 1491275        | G->A   | 346H       | <i>glgB</i>     | Rv1326c | IMR                          |
| 1.1.3.1   | <b>403481</b>  | C->T   | 787R       | <i>Rv0338c</i>  | Rv0338c | IMR                          |
| 1.1.3.2   | <b>285096</b>  | G->T   | 586R       | <i>aftD</i>     | Rv0236c | cell wall and cell processes |
| 1.1.3.3   | <b>2738352</b> | C->T   | 445A       | <i>obg</i>      | Rv2440c | IMR                          |
| 1.2       | <b>1136017</b> | A->G   | 155G       | <i>prsA</i>     | Rv1017c | IMR                          |
| 1.2.1     | <b>590595</b>  | G->A   | 171Q       | <i>proC</i>     | Rv0500  | IMR                          |
| 1.2.2     | <b>528781</b>  | G->A   | 58E        | <i>groEL2</i>   | Rv0440  | VDA                          |
| 1.2.2.1   | <b>2737201</b> | A->C   | 349S       | <i>proB</i>     | Rv2439c | IMR                          |
| 1.3       | <b>2763624</b> | G->A   | 51L        | <i>clpP1</i>    | Rv2461c | IMR                          |
| 1.3.1     | <b>1245275</b> | C->T   | 49A        | <i>gnd2</i>     | Rv1122  | IMR                          |
| 1.3.2     | <b>61842</b>   | T->C   | 483L       | <i>dnaB</i>     | Rv0058  | information pathways         |
| 2         | <b>282892</b>  | C->T   | 1320T      | <i>aftD</i>     | Rv0236c | cell wall and cell processes |
| 2.1       | <b>648465</b>  | A->G   | 169A       | <i>Rv0556</i>   | Rv0556  | cell wall and cell processes |
| 2.2       | 2505085        | G->A   | 205A       | <i>cobC*</i>    | Rv2231c | IMR                          |
| 2.2.1     | <b>2078246</b> | C->G   | 790G       | <i>gcvB</i>     | Rv1832  | IMR                          |
| 2.2.1.1   | <b>1947282</b> | A->G   | 46R        | <i>vapC12*</i>  | Rv1720c | VDA                          |
| 2.2.1.2   | <b>1692069</b> | A->G   | 60A        | <i>Rv1501*</i>  | Rv1501  | conserved hypotheticals      |
| 2.2.2     | 346693         | G->T   | 353S       | <i>eccC3</i>    | Rv0284  | cell wall and cell processes |
| 3         | <b>342873</b>  | C->T   | 248V       | <i>eccA3</i>    | Rv0282  | cell wall and cell processes |
| 3.1       | <b>958362</b>  | C->G   | 690A       | <i>fadB*</i>    | Rv0860  | lipid metabolism             |
| 3.1.1     | <b>1591545</b> | G->T   | 383P       | <i>ribA2</i>    | Rv1415  | IMR                          |
| 3.1.2     | 3722702        | G->C   | 310L       | <i>trpS</i>     | Rv3336c | information pathways         |
| 3.1.2.1   | 1237818        | C->G   | 125L       | <i>Rv1111c*</i> | Rv1111c | conserved hypotheticals      |
| 3.1.2.2   | 2874344        | G->A   | 714R       | <i>alaS</i>     | Rv2555c | information pathways         |
| 3.2       | <b>17842</b>   | G->C   | 307A       | <i>pknA</i>     | Rv0015c | regulatory proteins          |
| 4         | <b>2825466</b> | G->A   | 263K       | <i>Rv2509</i>   | Rv2509  | IMR                          |
| 4.1       | 62657          | G->A   | 754P       | <i>dnaB</i>     | Rv0058  | information pathways         |
| 4.1.1     | 514245         | C->T   | 359V       | <i>ctpH*</i>    | Rv0425c | cell wall and cell processes |
| 4.1.1.1   | <b>1006080</b> | G->A   | 161V       | <i>prrA</i>     | Rv0903c | regulatory proteins          |
| 4.1.1.2   | <b>1109535</b> | G->A   | 88K        | <i>galU</i>     | Rv0993  | IMR                          |
| 4.1.1.3   | 4229087        | C->T   | 247N       | <i>glfT1</i>    | Rv3782  | cell wall and cell processes |
| 4.1.1.3.1 | <b>286300</b>  | C->A   | 184A       | <i>aftD</i>     | Rv0236c | cell wall and cell processes |
| 4.1.2     | <b>3147742</b> | A->G   | 44V        | <i>infB</i>     | Rv2839c | information pathways         |
| 4.1.2.1   | <b>342340</b>  | C->T   | 71L        | <i>eccA3</i>    | Rv0282  | cell wall and cell processes |
| 4.1.2.1.1 | <b>2488724</b> | C->G   | 370P       | <i>glnA1</i>    | Rv2220  | IMR                          |
| 4.1.3     | <b>1564799</b> | C->T   | 133P       | <i>gmk</i>      | Rv1389  | IMR                          |

|           |                |      |      |                 |         |                              |
|-----------|----------------|------|------|-----------------|---------|------------------------------|
| 4.1.4     | <b>58786</b>   | G->C | 67V  | <i>ssb</i>      | Rv0054  | information pathways         |
| 4.2       | <b>1466779</b> | C->T | 313I | <i>atpD</i>     | Rv1310  | IMR                          |
| 4.2.1     | 783601         | A->C | 373R | <i>fusA1</i>    | Rv0684  | information pathways         |
| 4.2.1.1   | <b>870187</b>  | C->T | 60D  | <i>purB</i>     | Rv0777  | IMR                          |
| 4.2.2     | <b>353766</b>  | T->C | 228I | <i>eccD3</i>    | Rv0290  | cell wall and cell processes |
| 4.2.2.1   | 1455780        | T->C | 96L  | <i>prfA</i>     | Rv1299  | information pathways         |
| 4.2.2.2   | <b>611463</b>  | G->A | 204T | <i>Rv0519c*</i> | Rv0519c | cell wall and cell processes |
| 4.3       | <b>1452071</b> | C->A | 25G  | <i>thrB</i>     | Rv1296  | IMR                          |
| 4.3.1     | <b>825585</b>  | T->C | 262Y | <i>secY</i>     | Rv0732  | cell wall and cell processes |
| 4.3.1.1   | <b>1647807</b> | T->C | 273I | <i>Rv1461</i>   | Rv1461  | conserved hypotheticals      |
| 4.3.2     | <b>3414791</b> | G->C | 56A  | <i>nrdH</i>     | Rv3053c | information pathways         |
| 4.3.2.1   | <b>784581</b>  | G->C | 699T | <i>fusA1</i>    | Rv0684  | information pathways         |
| 4.3.3     | <b>2077253</b> | G->A | 459T | <i>gcvB</i>     | Rv1832  | IMR                          |
| 4.3.4     | <b>1297327</b> | G->A | 392V | <i>lpqW</i>     | Rv1166  | cell wall and cell processes |
| 4.3.4.1   | <b>1274335</b> | G->A | 327L | <i>mmpL13b*</i> | Rv1146  | cell wall and cell processes |
| 4.3.4.2   | <b>784440</b>  | G->T | 652A | <i>fusA1</i>    | Rv0684  | information pathways         |
| 4.3.4.2.1 | <b>225495</b>  | T->C | 359V | <i>Rv0193c*</i> | Rv0193c | conserved hypotheticals      |
| 4.4       | 4307886        | G->A | 343R | <i>serS</i>     | Rv3834c | information pathways         |
| 4.4.1     | <b>2905505</b> | G->A | 196T | <i>hisS</i>     | Rv2580c | information pathways         |
| 4.4.1.1   | 355181         | G->A | 228K | <i>mycP3</i>    | Rv0291  | IMR                          |
| 4.4.1.1.1 | <b>15036</b>   | C->G | 41A  | <i>trpG</i>     | Rv0013  | IMR                          |
| 4.4.1.2   | <b>342201</b>  | C->G | 24P  | <i>eccA3</i>    | Rv0282  | cell wall and cell processes |
| 4.4.2     | <b>985287</b>  | G->A | 495P | <i>fprB*</i>    | Rv0886  | IMR                          |
| 4.5       | <b>620029</b>  | C->T | 47L  | <i>ccsA</i>     | Rv0529  | IMR                          |
| 4.6       | <b>18091</b>   | G->A | 224T | <i>pknA</i>     | Rv0015c | regulatory proteins          |
| 4.6.1     | 4260268        | G->C | 293A | <i>pkS13</i>    | Rv3800c | lipid metabolism             |
| 4.6.1.1   | <b>4406749</b> | G->A | 261L | <i>parA</i>     | Rv3918c | cell wall and cell processes |
| 4.6.1.2   | <b>1098698</b> | C->G | 397G | <i>mprB</i>     | Rv0982  | regulatory proteins          |
| 4.6.2     | <b>4260742</b> | G->A | 135P | <i>pkS13</i>    | Rv3800c | lipid metabolism             |
| 4.6.2.1   | <b>896119</b>  | C->T | 100F | <i>purL</i>     | Rv0803  | IMR                          |
| 4.6.2.2   | 2875883        | C->T | 201L | <i>alaS</i>     | Rv2555c | information pathways         |
| 4.6.3     | <b>734562</b>  | G->A | 103K | <i>nusG</i>     | Rv0639  | information pathways         |
| 4.6.4     | <b>4236903</b> | G->A | 375A | <i>dprE1</i>    | Rv3790  | lipid metabolism             |
| 4.6.5     | <b>17665</b>   | G->A | 366N | <i>pknA</i>     | Rv0015c | regulatory proteins          |
| 4.7       | <b>716918</b>  | G->A | 85T  | <i>vapC30*</i>  | Rv0624  | VDA                          |
| 4.8       | <b>1130526</b> | G->A | 112A | <i>ispE</i>     | Rv1011  | IMR                          |
| 4.8.1     | <b>2914906</b> | G->C | 277T | <i>secD</i>     | Rv2587c | cell wall and cell processes |
| 4.8.2     | <b>2417281</b> | G->A | 65Y  | <i>murX</i>     | Rv2156c | cell wall and cell processes |
| 4.8.3     | <b>616408</b>  | C->G | 62A  | <i>Rv0525</i>   | Rv0525  | conserved hypotheticals      |
| 4.9       | <b>420008</b>  | A->G | 58A  | <i>dnaK</i>     | Rv0350  | VDA                          |
| 4.9.1     | <b>119600</b>  | C->G | 629V | <i>Rv0102</i>   | Rv0102  | cell wall and cell processes |
| 5         | 1799921        | C->A | 113G | <i>hisD</i>     | Rv1599  | IMR                          |
| 6         | <b>982363</b>  | G->T | 64G  | <i>serC</i>     | Rv0884c | IMR                          |
| 7         | 1137518        | G->A | 181N | <i>glmU</i>     | Rv1018c | cell wall and cell processes |

|                 |                |      |      |             |         |                      |
|-----------------|----------------|------|------|-------------|---------|----------------------|
| 8               | <b>221190</b>  | G->T | 178V | <i>ilvD</i> | Rv0189c | IMR                  |
| 9               | <b>2750052</b> | G->A | 58T  | <i>valS</i> | Rv2448c | information pathways |
| <i>M.bovis</i>  | <b>62768</b>   | A->G | 791G | <i>dnaB</i> | Rv0058  | information pathways |
| <i>M.capræ</i>  | <b>904090</b>  | T->C | 122G | <i>purM</i> | Rv0809  | IMR                  |
| <i>M.orygis</i> | <b>44812</b>   | G->T | 417P | <i>leuS</i> | Rv0041  | information pathways |

All essential genes (except \*) with synonymous changes; Bolded - different from reference [1]; IMR = Intermediary metabolism and respiration; VDA = virulence, detoxification, adaptation

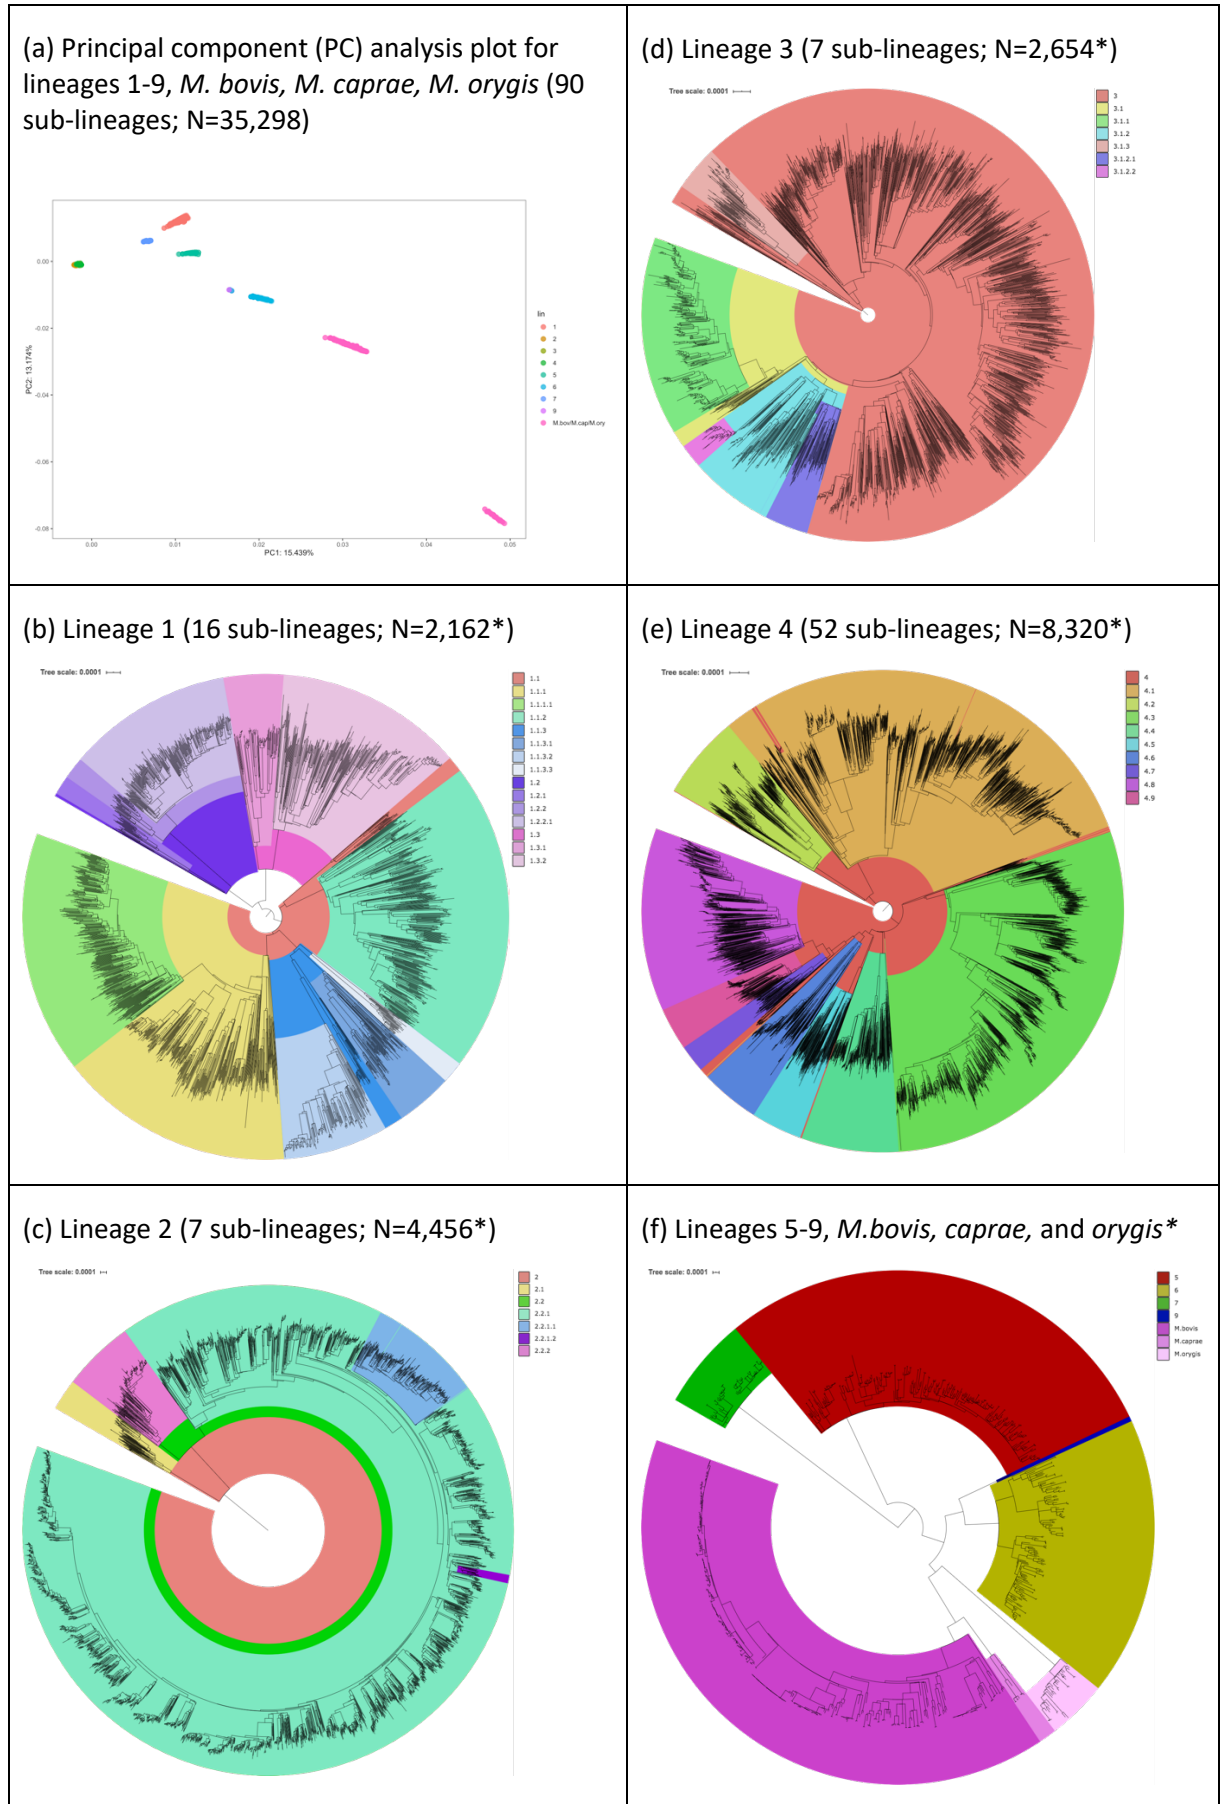

Fig S1: Population structure of the *Mycobacterium tuberculosis* complex isolates by lineage; \* training



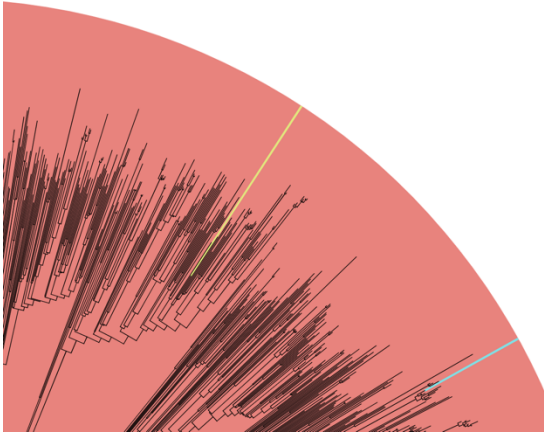

**(a)** Samples labelled as belonging to 3.1 (yellow) and 3.1.2 (blue) are embedded in the parental clade 3 (red); these samples were therefore re-assigned to the parent clade 3.

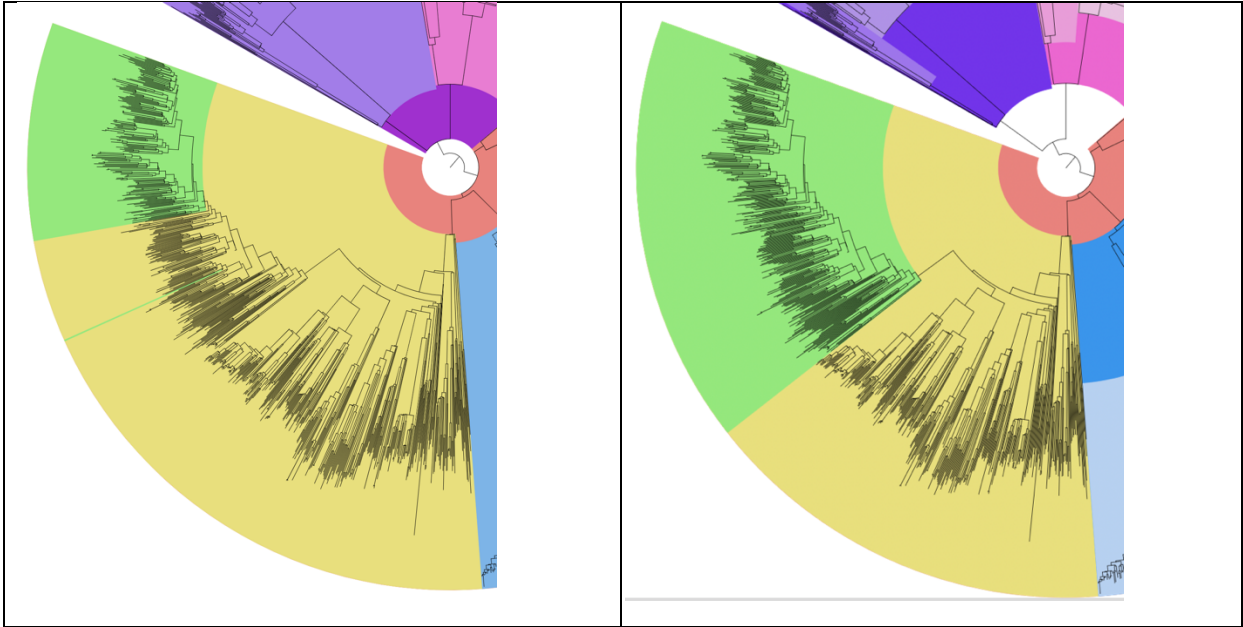

**(b)** Samples originally labelled 1.1.1.1 (green, left) are within a clade deeper in the tree than they ought to be. The long central branch in the middle of the 1.1.1 (yellow) parent clade suggests a more natural position for this lineage, as shown in (right)

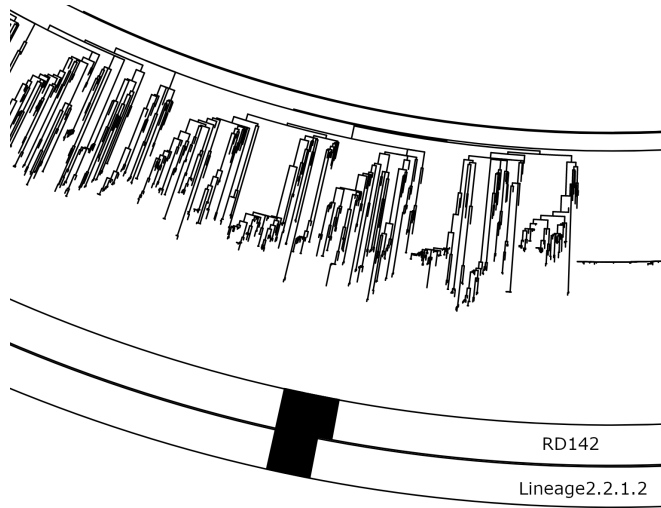

**(c)** Lineage 2.2.1.2 was defined to reflect the strains containing the RD142 deletion. The original barcode SNP did not capture all strains with this RD and needed to be redefined

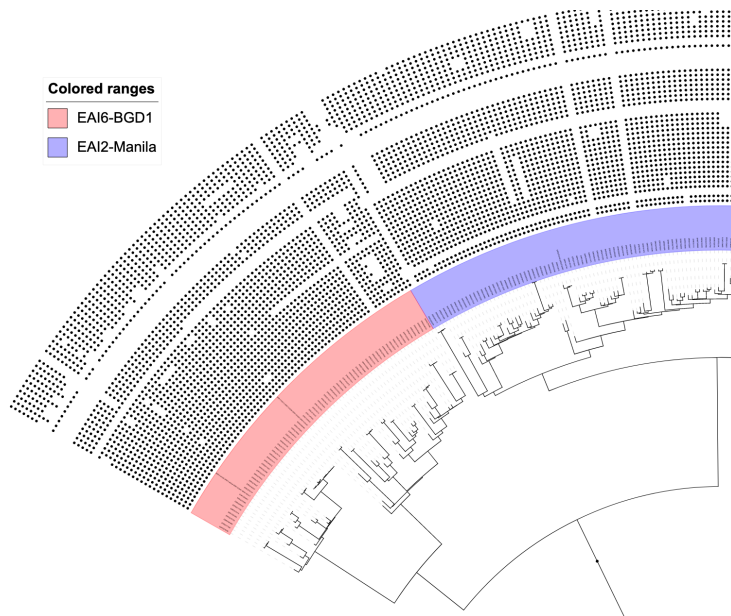

**(d)** Lineage 1.2.1 encapsulated a large clade with low imbalance and late diversification timing, which was further partitioned into lineage 1.2.1 and 1.2.2, which now reflect members of the EAI6-BGD1 and EAI2-Manila/EAI2-Nonthaburi families, respectively

**Fig S2 (a)-(d): Examples of discrepancies using the 62-SNP barcode**

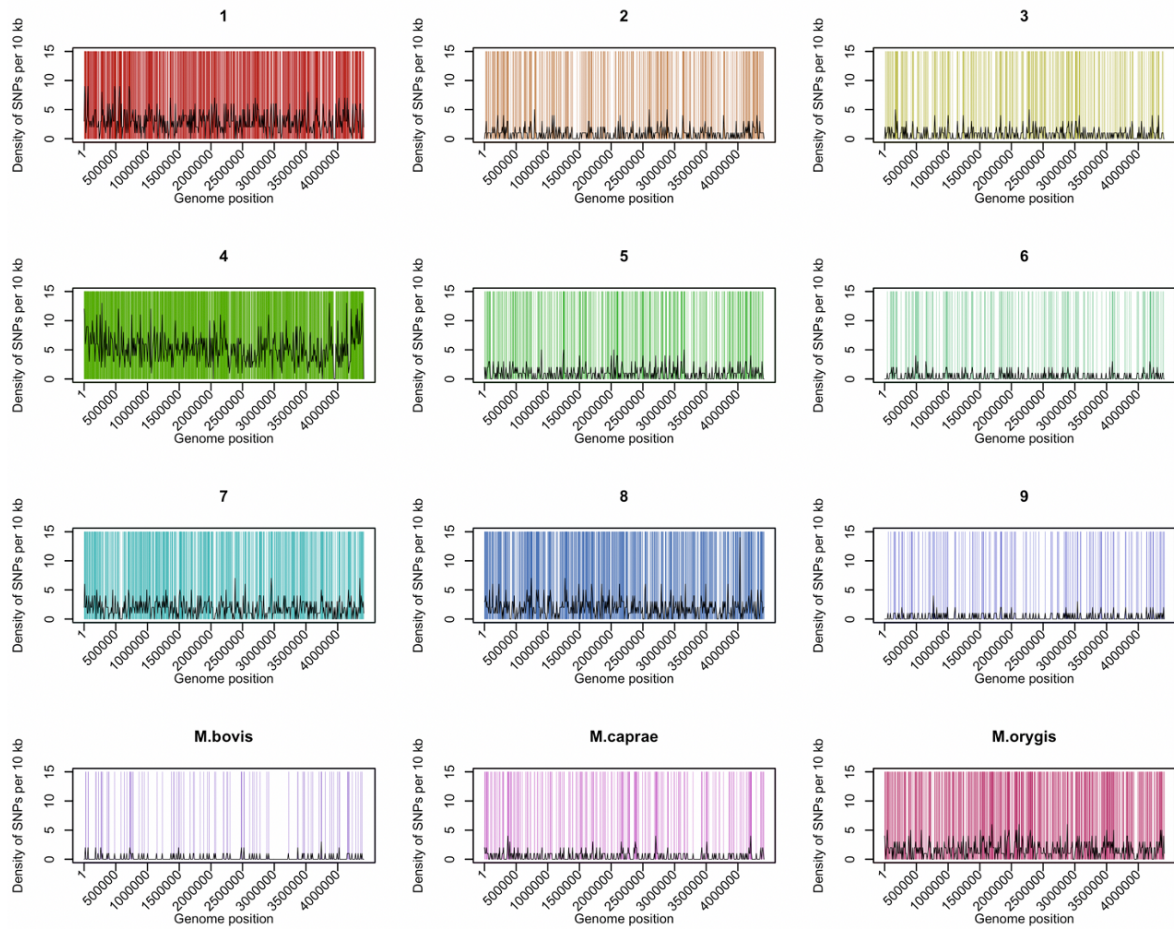

**Fig S3: The genome-wide distribution and density (per 10kb) of barcoding SNPs ( $F_{ST}=1$ ) for each lineage**

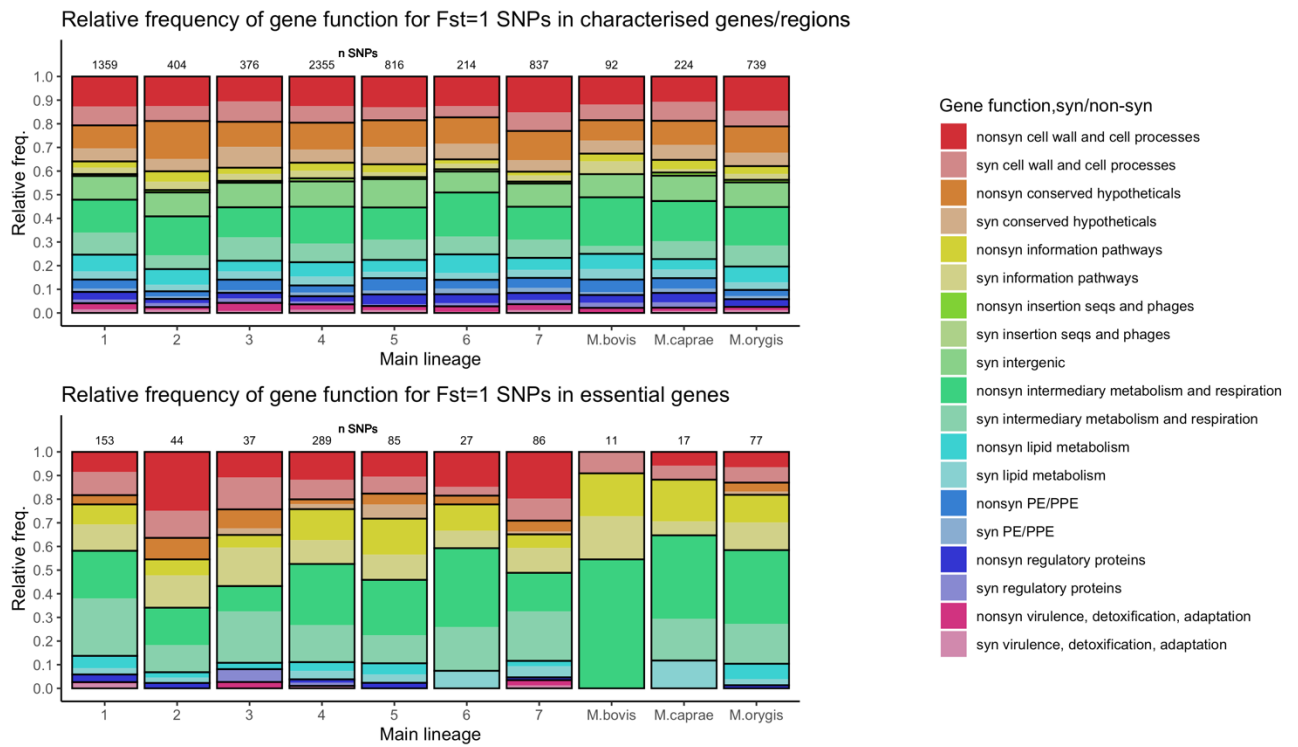

**Fig S4: Functional differences between genes containing lineage-barcoding ( $F_{ST}=1$ ) SNPs\***

\* Lineages 8 (N=2) and 9 (N=3) have been excluded due to their small sample sizes

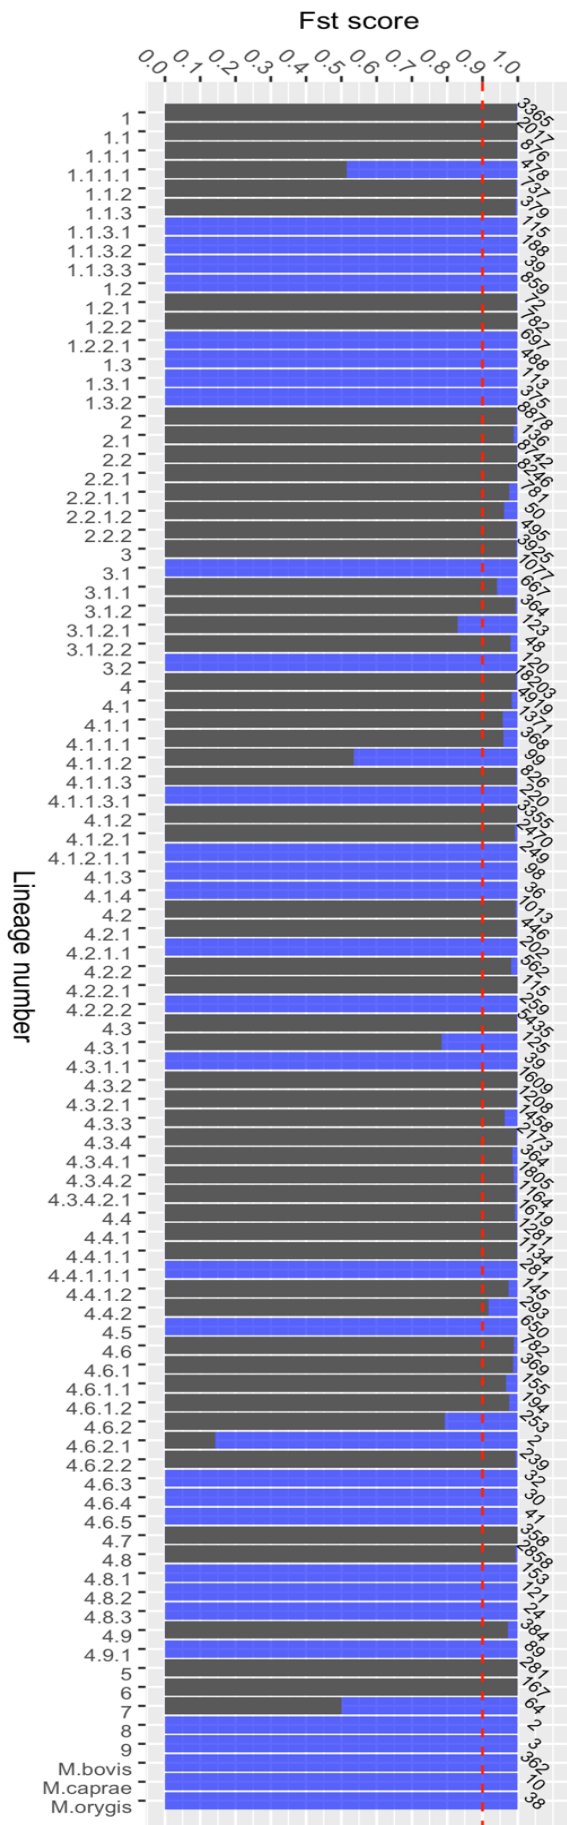

**Fig S5: Differentiation of sub-lineages\* when comparing the 62- versus 90-SNP barcodes**  
 Blue is the incremental improvement in the new 90-SNP barcode; \* based on the  $F_{ST}$  measure where values of 1 mean that the barcoding SNPs perfectly differentiate the sub-lineage (versus any other); sub-lineage 4.5 is entirely blue, because we identified a new barcoding SNP which did not lie within a genomic region containing a common deletion

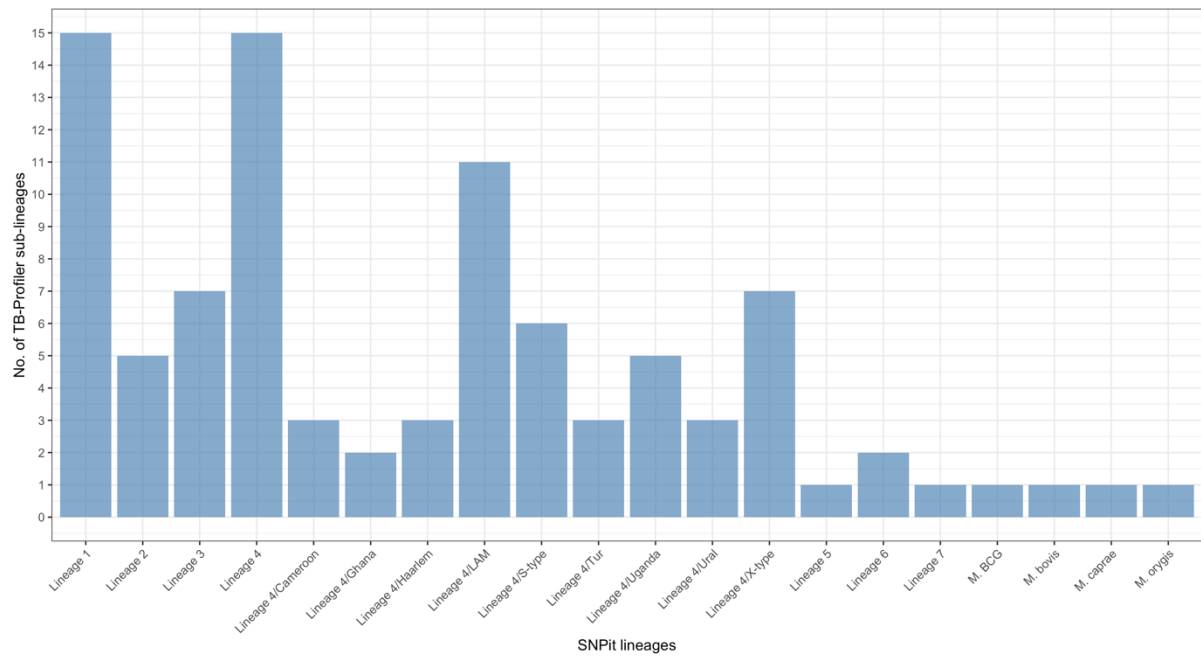

**Fig S6: The increased resolution of our 90-SNP barcode (implemented in *TB-Profiler* software) over the comparable (sub-)lineages of the *SNP-IT* tool**
